# Supplementary material
Source: PubMed Central journal article supplement (PMC2900500)
Supplement: NIHMS193819-supplement-01.pdf [file NIHMS193819-supplement-01.pdf]

## Supplement 1

### Correlations between FA and Age

Significant negative correlations were observed, across groups, between age and FA in CC3 ( $r(38) = -.330, p = 0.043$ ), CC4 ( $r(38) = -.413, p = 0.01$ ), CC5 ( $r(38) = -.488, p = 0.002$ ) and CC6 ( $r(38) = -.400, p = 0.013$ ). The magnitude of the correlation between age and FA in the SZ patients did not differ significantly from the magnitude of the age / FA correlation in the HC participants in any of these CC regions (CC3:  $z = 0.56, p = 0.576$ ; CC4:  $z = 0.64, p = 0.522$ ; CC5:  $z = 0.37, p = 0.711$ ; CC6:  $z = 0.74, p = 0.459$ ). No significant correlations were observed between participants' age and Mode in any of the 6 CC segments. Similarly, no significant correlations were observed between the SZ patients' duration-of-illness and either their FA or Mode in any of the 6 CC segments.

The statistically significant negative correlations observed (across groups) between age and FA replicates the results of several previous studies (1-3), and provides further evidence that FA, after increasing through adolescence and early adulthood (4), tends to decline through middle-age and beyond (1). It is as yet unclear whether the microstructural mechanisms responsible for these age-related FA reductions are the same mechanisms underlying the FA abnormalities that have consistently been observed in SZ patients. Uncovering the microstructural mechanisms of FA decline in normal aging is a worthwhile aim for future research which would have significant implications for the model of schizophrenia as a disorder of 'accelerated aging' (5).

### **Supplementary analyses of the positive correlation between FA and Reality Distortion**

To ensure the robustness of the observed positive correlation between FA and Reality Distortion, we divided the SZ patients (on the basis of a median split) into those with 'severe' FA abnormalities ( $n = 10$ ) and those with relatively 'mild' FA abnormalities in CC1, and compared the magnitude of the FA / Reality Distortion correlation in these two sub-groups. The magnitude of the FA / Reality Distortion correlation did not differ significantly between the two sub-groups ('severe':  $r(10) = .554, p = 0.096$ ; 'mild':  $r(9) = .516, p = 0.155$ ; 'severe' vs. 'mild':  $z = 0.1, p = 0.920$ ), indicating that a positive correlation between FA and Reality Distortion was present in patients with both severe and mild CC abnormalities.

### **Correlations between FA / Mode and CPZ-equivalent medication dosage in the SZ patients**

The correlation between patients' CPZ-equivalent medication dosage for FA in CC1 was  $r(19) = -.100, p = 0.684$ , and for Radial Diffusivity the correlation was  $r(19) = -.089, p = 0.718$ . The correlation between patients' CPZ-equivalent medication dosage and their Mode in CC4 was  $r(19) = .059, p = 0.809$ . There were no significant correlations between patients' CPZ-equivalent medication dosages and their FA, Mode, or Radial Diffusivity in any of the 6 CC segments.

1. Burzynska A, Preuschhof C, Bäckman L, Nyberg L, Li S, Lindenberger U, *et al.* (2010): Age-related differences in white matter microstructure: Region-specific patterns of diffusivity. *Neuroimage*. 49:2104-2112.
2. Zhang Y, AT D, Hayasaka S, Jahng G, Hlavin J, Zhan W, *et al.* (in press): Patterns of age-related water diffusion changes in the human brain by concordance and discordance analysis. *Neurobiol Aging*. 2008 Nov 24. [Epub ahead of print].
3. Rosenberger G, Kubicki M, Nestor P, Connor E, Bushnell G, Markant D, *et al.* (2008): Age-related deficits in fronto-temporal connections in schizophrenia: a diffusion tensor imaging study. *Schizophr Res*. 102:181-188.
4. Schneiderman J, Buchsbaum M, Haznedar M, Hazlett E, Brickman A, Shihabuddin L, *et al.* (2007): Diffusion tensor anisotropy in adolescents and adults. *Neuropsychobiology*. 55:96-111.
5. Kirkpatrick B, Messias E, Harvey P, Fernandez-Egea E, Bowie C (2008): Is schizophrenia a syndrome of accelerated aging? *Schizophr Bull*. 34:1024-1032.
